# Supplementary material for: Organic and Peptidyl Constituents of Snake Venoms: The Picture Is Vastly More Complex Than We Imagined
Source: MDPI journal article supplement (doi:10.3390/toxins10100392), 2018-09-26
Supplement: s1 [file s1]

Percentile Cutoffs

|      | <i>Bungarus multicinctus</i> | <i>Dendroaspis polylepis</i> | <i>Micrurus spixii</i> | <i>Micrurus surinamensis</i> 1 | <i>Micrurus surinamensis</i> 2 | <i>Micrurus surinamensis</i> 3 | <i>Naja kaouthia</i> | <i>Ophiophagus hannah</i> | <i>Cerastes cerastes</i> | <i>Daboia siamensis</i> | <i>Agkistrodon piscivorus leucostoma</i> | <i>Bothrops moojeni</i> | <i>Crotalus durissus terrificus</i> | <i>Crotalus viridis viridis</i> | <i>Ovophis okinavensis</i> | <i>Protobothrops elegans</i> | <i>Protobothrops flavoviridis</i> |
|------|------------------------------|------------------------------|------------------------|--------------------------------|--------------------------------|--------------------------------|----------------------|---------------------------|--------------------------|-------------------------|------------------------------------------|-------------------------|-------------------------------------|---------------------------------|----------------------------|------------------------------|-----------------------------------|
| 100% | 2.770E+08                    | 1.256E+09                    | 4.228E+08              | 2.710E+08                      | 2.745E+08                      | 1.130E+08                      | 1.951E+08            | 4.908E+08                 | 7.507E+08                | 1.011E+09               | 8.094E+08                                | 8.391E+08               | 6.012E+08                           | 1.279E+09                       | 7.869E+08                  | 6.815E+08                    | 9.270E+08                         |
| 10%  | 2.770E+07                    | 1.256E+08                    | 4.228E+07              | 2.710E+07                      | 2.745E+07                      | 1.130E+07                      | 1.951E+07            | 4.908E+07                 | 7.507E+07                | 1.011E+08               | 8.094E+07                                | 8.391E+07               | 6.012E+07                           | 1.279E+08                       | 7.869E+07                  | 6.815E+07                    | 9.270E+07                         |
| 20%  | 5.540E+07                    | 2.512E+08                    | 8.456E+07              | 5.420E+07                      | 5.489E+07                      | 2.260E+07                      | 3.901E+07            | 9.817E+07                 | 1.501E+08                | 2.022E+08               | 1.619E+08                                | 1.678E+08               | 1.202E+08                           | 2.558E+08                       | 1.574E+08                  | 1.363E+08                    | 1.854E+08                         |
| 30%  | 8.310E+07                    | 3.769E+08                    | 1.268E+08              | 8.129E+07                      | 8.234E+07                      | 3.390E+07                      | 5.852E+07            | 1.473E+08                 | 2.252E+08                | 3.032E+08               | 2.428E+08                                | 2.517E+08               | 1.803E+08                           | 3.837E+08                       | 2.361E+08                  | 2.045E+08                    | 2.781E+08                         |
| 40%  | 1.108E+08                    | 5.025E+08                    | 1.691E+08              | 1.084E+08                      | 1.098E+08                      | 4.520E+07                      | 7.802E+07            | 1.963E+08                 | 3.003E+08                | 4.043E+08               | 3.238E+08                                | 3.356E+08               | 2.405E+08                           | 5.116E+08                       | 3.148E+08                  | 2.726E+08                    | 3.708E+08                         |
| 50%  | 1.385E+08                    | 6.281E+08                    | 2.114E+08              | 1.355E+08                      | 1.372E+08                      | 5.649E+07                      | 9.753E+07            | 2.454E+08                 | 3.754E+08                | 5.054E+08               | 4.047E+08                                | 4.195E+08               | 3.006E+08                           | 6.395E+08                       | 3.935E+08                  | 3.408E+08                    | 4.635E+08                         |
| 60%  | 1.662E+08                    | 7.537E+08                    | 2.537E+08              | 1.626E+08                      | 1.647E+08                      | 6.779E+07                      | 1.170E+08            | 2.945E+08                 | 4.504E+08                | 6.065E+08               | 4.857E+08                                | 5.035E+08               | 3.607E+08                           | 7.674E+08                       | 4.722E+08                  | 4.089E+08                    | 5.562E+08                         |

| ID# | Name                            | <i>Bungarus multicinctus</i> |        |
|-----|---------------------------------|------------------------------|--------|
|     |                                 | 2.770E+08                    | 100.0% |
| 6   | 4-Guanidinobutyric Acid         | 2.036E+07                    | 7.3%   |
| 49  | Choline                         | 1.817E+07                    | 13.9%  |
| 38  | Imidazoleacetic Acid            | 1.355E+07                    | 18.8%  |
| 23  | 5-guanidino-2-oxopentanoic Acid | 1.292E+07                    | 23.5%  |
| 43  | Guanine                         | 1.237E+07                    | 27.9%  |
| 52  | Betaine                         | 1.232E+07                    | 32.4%  |
| 21  | Guanosine                       | 1.031E+07                    | 36.1%  |
| 59  | Palmitic Acid                   | 9.539E+06                    | 39.5%  |
| 72  | Creatinine                      | 8.882E+06                    | 42.7%  |
| 32  | Creatine                        | 8.705E+06                    | 45.9%  |
| 80  | Stearic Acid                    | 8.671E+06                    | 49.0%  |
| 116 | Hydroxystearic Acid             | 7.041E+06                    | 51.6%  |
| 121 | Oleic Acid                      | 6.982E+06                    | 54.1%  |
| 142 | L-Arginine                      | 5.951E+06                    | 56.2%  |
| 19  | Hypoxanthine                    | 5.754E+06                    | 58.3%  |
| 36  | PP                              | 4.994E+06                    | 60.1%  |

| ID# | Name               | <i>Dendroaspis polylepis</i> |        |
|-----|--------------------|------------------------------|--------|
|     |                    | 1.256E+09                    | 100.0% |
| 1   | Adenosine          | 3.271E+08                    | 26.0%  |
| 2   | Adenine            | 1.447E+08                    | 37.6%  |
| 7   | Acetylcholine      | 1.026E+08                    | 45.7%  |
| 3   | Citric acid        | 6.909E+07                    | 51.2%  |
| 22  | Acetyl-L-carnitine | 5.280E+07                    | 55.4%  |
| 19  | Hypoxanthine       | 4.227E+07                    | 58.8%  |
| 26  | Inosine            | 4.183E+07                    | 62.1%  |

| ID# | Name                                | <i>Micrurus spixii spixii</i> |        |
|-----|-------------------------------------|-------------------------------|--------|
|     |                                     | 4.228E+08                     | 100.0% |
| 21  | Guanosine                           | 5.612E+07                     | 13.3%  |
| 23  | 5-guanidino-2-oxopentanoic Acid     | 3.004E+07                     | 20.4%  |
| 6   | 4-Guanidinobutyric Acid             | 2.693E+07                     | 26.7%  |
| 43  | Guanine                             | 2.305E+07                     | 32.2%  |
| 59  | Palmitic Acid                       | 1.344E+07                     | 35.4%  |
| 33  | Glycosylated Peptide = NGP + Hexose | 1.213E+07                     | 38.2%  |
| 1   | Adenosine                           | 1.092E+07                     | 40.8%  |
| 79  |                                     | 1.081E+07                     | 43.4%  |
| 92  | pE Peptide                          | 9.414E+06                     | 45.6%  |
| 80  | Stearic Acid                        | 8.433E+06                     | 47.6%  |
| 98  | Similar to Acadesine                | 8.375E+06                     | 49.6%  |
| 32  | Creatine                            | 8.318E+06                     | 51.6%  |
| 49  | Choline                             | 7.190E+06                     | 53.3%  |
| 112 |                                     | 7.161E+06                     | 55.0%  |
| 114 |                                     | 7.141E+06                     | 56.6%  |
| 144 | Prolylleucine                       | 5.781E+06                     | 58.0%  |
| 28  | Proline                             | 5.518E+06                     | 59.3%  |
| 145 |                                     | 5.280E+06                     | 60.6%  |

| ID# | Name                            | <i>Micrurus surinamensis</i> 1 |        |
|-----|---------------------------------|--------------------------------|--------|
|     |                                 | 2.710E+08                      | 100.0% |
| 17  | Creatine Riboside               | 7.154E+07                      | 26.4%  |
| 60  | Creatinine Compound             | 1.434E+07                      | 31.7%  |
| 81  |                                 | 1.072E+07                      | 35.7%  |
| 93  |                                 | 9.255E+06                      | 39.1%  |
| 109 |                                 | 7.424E+06                      | 41.8%  |
| 99  |                                 | 7.327E+06                      | 44.5%  |
| 23  | 5-guanidino-2-oxopentanoic Acid | 7.265E+06                      | 47.2%  |
| 128 |                                 | 6.194E+06                      | 49.5%  |
| 32  | Creatine                        | 5.671E+06                      | 51.6%  |
| 150 |                                 | 5.260E+06                      | 53.5%  |
| 34  | pEH                             | 3.927E+06                      | 55.0%  |
| 201 |                                 | 3.782E+06                      | 56.4%  |
| 159 |                                 | 3.297E+06                      | 57.6%  |
| 49  | Choline                         | 3.161E+06                      | 58.7%  |
| 28  | Proline                         | 3.108E+06                      | 59.9%  |
| 237 |                                 | 3.065E+06                      | 61.0%  |

| ID# | Name                            | <i>Micrurus surinamensis</i> 2 |        |
|-----|---------------------------------|--------------------------------|--------|
|     |                                 | 2.745E+08                      | 100.0% |
| 17  | Creatine Riboside               | 5.109E+07                      | 18.6%  |
| 60  | Creatinine Compound             | 1.626E+07                      | 24.5%  |
| 79  |                                 | 9.862E+06                      | 28.1%  |
| 99  |                                 | 8.372E+06                      | 31.2%  |
| 6   | 4-Guanidinobutyric Acid         | 8.177E+06                      | 34.2%  |
| 34  | pEH                             | 7.677E+06                      | 37.0%  |
| 120 |                                 | 6.960E+06                      | 39.5%  |
| 112 |                                 | 6.877E+06                      | 42.0%  |
| 32  | Creatine                        | 6.809E+06                      | 44.5%  |
| 131 |                                 | 6.576E+06                      | 46.9%  |
| 109 |                                 | 5.015E+06                      | 48.7%  |
| 23  | 5-guanidino-2-oxopentanoic Acid | 4.836E+06                      | 50.5%  |
| 177 |                                 | 4.276E+06                      | 52.0%  |
| 28  | Proline                         | 4.171E+06                      | 53.5%  |
| 190 |                                 | 3.876E+06                      | 55.0%  |
| 203 |                                 | 3.756E+06                      | 56.3%  |
| 144 | Prolylleucine                   | 3.676E+06                      | 57.7%  |
| 180 |                                 | 3.324E+06                      | 58.9%  |
| 222 |                                 | 3.223E+06                      | 60.0%  |
| 49  | Choline                         | 3.070E+06                      | 61.2%  |

| ID# | Name                            | <i>Micrurus surinamensis</i> 3 |        |
|-----|---------------------------------|--------------------------------|--------|
|     |                                 | 1.130E+08                      | 100.0% |
| 17  | Creatine Riboside               | 2.684E+07                      | 23.8%  |
| 23  | 5-guanidino-2-oxopentanoic Acid | 1.048E+07                      | 33.0%  |
| 60  | Creatinine Compound             | 4.535E+06                      | 37.0%  |
| 3   | Citric Acid                     | 3.426E+06                      | 40.1%  |
| 79  |                                 | 3.250E+06                      | 43.0%  |
| 112 |                                 | 2.915E+06                      | 45.5%  |
| 99  |                                 | 2.585E+06                      | 47.8%  |
| 32  | Creatine                        | 2.452E+06                      | 50.0%  |
| 6   | 4-Guanidinobutyric Acid         | 2.254E+06                      | 52.0%  |
| 177 |                                 | 2.130E+06                      | 53.9%  |
| 21  | Guanosine                       | 1.901E+06                      | 55.6%  |
| 93  |                                 | 1.754E+06                      | 57.1%  |
| 49  | Choline                         | 1.571E+06                      | 58.5%  |
| 59  | Palmitic Acid                   | 1.436E+06                      | 59.8%  |
| 28  | Proline                         | 1.361E+06                      | 61.0%  |

| ID# | Name                            | <i>Naja kaouthia</i> |        |
|-----|---------------------------------|----------------------|--------|
|     |                                 | 1.951E+08            | 100.0% |
| 3   | Citric Acid                     | 5.898E+07            | 30.2%  |
| 6   | 4-Guanidinobutyric Acid         | 2.313E+07            | 42.1%  |
| 23  | 5-guanidino-2-oxopentanoic Acid | 8.979E+06            | 46.7%  |
| 28  | Proline                         | 5.562E+06            | 49.6%  |
| 73  | Itaconic Acid                   | 4.163E+06            | 51.7%  |
| 21  | Guanosine                       | 3.941E+06            | 53.7%  |
| 32  | Creatine                        | 3.927E+06            | 55.7%  |
| 225 |                                 | 3.173E+06            | 57.3%  |
| 98  | Similar to Acadesine            | 3.037E+06            | 58.9%  |
| 43  | Guanine                         | 2.875E+06            | 60.4%  |

| ID# | Name                                 | <i>Ophiophagus hannah</i> |        |
|-----|--------------------------------------|---------------------------|--------|
|     |                                      | 4.908E+08                 | 100.0% |
| 6   | 4-Guanidinobutyric Acid              | 8.578E+07                 | 17.5%  |
| 33  | Glycosylated Peptide = NGP + Hexose  | 3.232E+07                 | 24.1%  |
| 23  | 5-guanidino-2-oxopentanoic Acid      | 3.147E+07                 | 30.5%  |
| 3   | Citric Acid                          | 2.330E+07                 | 35.2%  |
| 21  | Guanosine                            | 2.053E+07                 | 39.4%  |
| 36  | PP                                   | 1.652E+07                 | 42.8%  |
| 38  | Imidazoleacetic Acid                 | 1.589E+07                 | 46.0%  |
| 62  | Pyridine derivative                  | 1.492E+07                 | 49.0%  |
| 43  | Guanine                              | 1.396E+07                 | 51.9%  |
| 28  | Proline                              | 1.213E+07                 | 54.4%  |
| 97  | Glycosylated Peptide = NG + Hexose + | 8.717E+06                 | 56.1%  |
| 65  | Glycosylated Peptide = NGP + Hexose  | 7.352E+06                 | 57.6%  |
| 111 |                                      | 7.311E+06                 | 59.1%  |
| 98  | Similar to Acadesine                 | 6.929E+06                 | 60.5%  |

| ID# | Name                            | <i>Cerastes cerastes</i> |        |
|-----|---------------------------------|--------------------------|--------|
|     |                                 | 7.507E+08                | 100.0% |
| 4   | pEKW                            | 1.327E+08                | 17.7%  |
| 3   | Citric Acid                     | 1.103E+08                | 32.4%  |
| 16  | N-Acetylneuraminic Acid         | 7.307E+07                | 42.1%  |
| 32  | Creatine                        | 3.245E+07                | 46.4%  |
| 23  | 5-guanidino-2-oxopentanoic Acid | 2.610E+07                | 49.9%  |
| 6   | 4-Guanidinobutyric Acid         | 2.277E+07                | 52.9%  |
| 42  | pEE                             | 2.232E+07                | 55.9%  |
| 51  | pEK                             | 1.841E+07                | 58.4%  |
| 58  | pEPQ                            | 1.723E+07                | 60.7%  |

| ID# | Name                       | <i>Daboia siamensis</i> |        |
|-----|----------------------------|-------------------------|--------|
|     |                            | 1.011E+09               | 100.0% |
| 3   | Citric Acid                | 1.271E+08               | 12.6%  |
| 6   | 4-Guanidinobutyric Acid    | 1.189E+08               | 24.3%  |
| 19  | Hypoxanthine               | 5.768E+07               | 30.0%  |
| 16  | N-Acetylneuraminic Acid    | 5.309E+07               | 35.3%  |
| 26  | Inosine                    | 3.749E+07               | 39.0%  |
| 36  | PP                         | 2.937E+07               | 41.9%  |
| 38  | Imidazoleacetic Acid       | 2.591E+07               | 44.5%  |
| 40  | Pyroglutamate (Oxoproline) | 2.503E+07               | 46.9%  |
| 21  | Guanosine                  | 2.408E+07               | 49.3%  |
| 17  | Creatine Riboside          | 2.403E+07               | 51.7%  |
| 28  | Proline                    | 2.255E+07               | 53.9%  |
| 46  | Contains Methylpyrimidine  | 2.065E+07               | 56.0%  |
| 49  | Choline                    | 1.952E+07               | 57.9%  |
| 52  | Betaine                    | 1.790E+07               | 59.7%  |
| 71  |                            | 1.265E+07               | 60.9%  |

| ID# | Name                             | <i>Agkistrodon p. leucostoma</i> |        |
|-----|----------------------------------|----------------------------------|--------|
|     |                                  | 8.094E+08                        | 100.0% |
| 3   | Citric Acid                      | 1.202E+08                        | 14.8%  |
| 18  | RPPHP                            | 6.067E+07                        | 22.3%  |
| 25  | pEGRP                            | 4.299E+07                        | 27.7%  |
| 31  | HPPPRPQIPP                       | 3.436E+07                        | 31.9%  |
| 9   | pENW                             | 3.154E+07                        | 35.8%  |
| 5   | TPPAGPDVVGPR                     | 2.048E+07                        | 38.3%  |
| 23  | 5-guanidino-2-oxopentanoic Acid  | 1.663E+07                        | 40.4%  |
| 16  | N-Acetylneuraminic Acid          | 1.638E+07                        | 42.4%  |
| 42  | pEE                              | 1.469E+07                        | 44.2%  |
| 64  | KVTPVPR                          | 1.431E+07                        | 46.0%  |
| 67  | pELWRPPHIPP                      | 1.370E+07                        | 47.7%  |
| 37  | Cytidine                         | 1.359E+07                        | 49.4%  |
| 8   | pEIWPRPH                         | 1.147E+07                        | 50.8%  |
| 12  | pEWQ                             | 1.118E+07                        | 52.2%  |
| 51  | pEK                              | 1.077E+07                        | 53.5%  |
| 82  | Prolyl Peptide; no pyroglutamate | 1.071E+07                        | 54.8%  |
| 73  | Itaconic Acid                    | 9.986E+06                        | 56.0%  |
| 89  | pELPP                            | 9.839E+06                        | 57.3%  |
| 94  |                                  | 9.168E+06                        | 58.4%  |
| 39  | pEQ                              | 8.528E+06                        | 59.4%  |
| 102 |                                  | 8.256E+06                        | 60.5%  |

| ID# | Name                             | <i>Bothrops moojeni</i> |        |
|-----|----------------------------------|-------------------------|--------|
|     |                                  | 8.391E+08               | 100.0% |
| 3   | Citric Acid                      | 1.011E+08               | 12.1%  |
| 23  | 5-guanidino-2-oxopentanoic Acid  | 5.000E+07               | 18.0%  |
| 6   | 4-Guanidinobutyric Acid          | 4.951E+07               | 23.9%  |
| 12  | pEWQ                             | 4.374E+07               | 29.1%  |
| 27  | pEKWV(GP)(G)(PE)PIPP             | 4.007E+07               | 33.9%  |
| 9   | pENW                             | 2.730E+07               | 37.2%  |
| 48  | PGP(GC)P(R)(G)(PE)PIPP           | 2.005E+07               | 39.5%  |
| 50  | Unknown                          | 1.916E+07               | 41.8%  |
| 39  | pEQ                              | 1.378E+07               | 43.5%  |
| 37  | Cytidine                         | 1.239E+07               | 44.9%  |
| 73  | Itaconic Acid                    | 1.067E+07               | 46.2%  |
| 38  | Imidazoleacetic Acid             | 1.057E+07               | 47.5%  |
| 28  | Proline                          | 1.051E+07               | 48.7%  |
| 40  | Pyroglutamate (Oxoproline)       | 1.048E+07               | 50.0%  |
| 88  | EPGP(R)(P)(WQQG)IIPP             | 9.889E+06               | 51.2%  |
| 90  | pESN                             | 9.772E+06               | 52.3%  |
| 42  | pEE                              | 8.855E+06               | 53.4%  |
| 61  | pEGE                             | 8.801E+06               | 54.4%  |
| 103 | Prolyl Peptide; no pyroglutamate | 8.044E+06               | 55.4%  |
| 78  | pES                              | 7.632E+06               | 56.3%  |
| 115 | pEEGT                            | 7.091E+06               | 57.1%  |
| 122 | GP                               | 7.005E+06               | 58.0%  |
| 36  | PP                               | 6.960E+06               | 58.8%  |
| 51  | pEK                              | 6.752E+06               | 59.6%  |
| 49  | Choline                          | 6.645E+06               | 60.4%  |

| ID# | Name                            | <i>Crotalus d. terrificus</i> |        |
|-----|---------------------------------|-------------------------------|--------|
|     |                                 | 6.012E+08                     | 100.0% |
| 3   | Citric Acid                     | 1.397E+08                     | 23.2%  |
| 32  | Creatine                        | 3.174E+07                     | 28.5%  |
| 6   | 4-Guanidinobutyric Acid         | 3.064E+07                     | 33.6%  |
| 23  | 5-guanidino-2-oxopentanoic Acid | 2.893E+07                     | 38.4%  |
| 9   | pENW                            | 2.595E+07                     | 42.7%  |
| 36  | PP                              | 1.782E+07                     | 45.7%  |
| 49  | Choline                         | 1.350E+07                     | 48.0%  |
| 72  | Creatinine                      | 1.246E+07                     | 50.0%  |
| 73  | Itaconic Acid                   | 1.230E+07                     | 52.1%  |
| 16  | N-Acetylneuraminic Acid         | 1.019E+07                     | 53.8%  |
| 107 |                                 | 7.500E+06                     | 55.0%  |
| 108 |                                 | 7.467E+06                     | 56.3%  |
| 12  | pEWQ                            | 7.375E+06                     | 57.5%  |
| 123 | Aconitic Acid                   | 6.979E+06                     | 58.6%  |
| 125 |                                 | 6.819E+06                     | 59.8%  |
| 127 |                                 | 6.745E+06                     | 60.9%  |

| ID# | Name                    | <i>Crotalus v. viridis</i> |        |
|-----|-------------------------|----------------------------|--------|
|     |                         | 1.279E+09                  | 100.0% |
| 5   | TPPAGPDVVGPR            | 1.234E+08                  | 9.6%   |
| 3   | Citric Acid             | 1.157E+08                  | 18.7%  |
| 8   | pEIWPRPH                | 9.524E+07                  | 26.1%  |
| 9   | pENW                    | 8.891E+07                  | 33.1%  |
| 6   | 4-Guanidinobutyric Acid | 8.737E+07                  | 39.9%  |
| 14  | pEEWPPGHHIPP            | 7.478E+07                  | 45.8%  |
| 15  | pENWPAPK                | 7.311E+07                  | 51.5%  |
| 20  | VP                      | 5.630E+07                  | 55.9%  |
| 28  | Proline                 | 3.839E+07                  | 58.9%  |
| 30  | (QPQGRPPHPVPP           | 3.511E+07                  | 61.7%  |
